# Supplementary material
Source: PubMed Central journal article supplement (PMC1458881)
Supplement: pnas_0601277103_2.pdf [file pnas_0601277103_2.pdf]

**Table 3. Isolation of *V. cholerae* O1 from environmental waters by different enrichment and culture techniques**

| Mo and yr of sampling | No. of samples analyzed | No. (%) positive for <i>V. cholerae</i> O1 by conventional enrichment culture method | No. (%) positive for <i>V. cholerae</i> O1 by AST method <sup>†</sup> | Mean concentration (cfu/ml) of <i>V. cholerae</i> O1 after enrichment for 6 h and culture under various conditions* |                                                                                  |                                         | % SM <sup>R</sup> cells expressing resistance prior to enrichment in BP medium [(A/C) × 100] | % of total <i>V. cholerae</i> O1 cells detected by conventional enrichment culture [(B/C) × 100] |
|-----------------------|-------------------------|--------------------------------------------------------------------------------------|-----------------------------------------------------------------------|---------------------------------------------------------------------------------------------------------------------|----------------------------------------------------------------------------------|-----------------------------------------|----------------------------------------------------------------------------------------------|--------------------------------------------------------------------------------------------------|
|                       |                         |                                                                                      |                                                                       | Enriched in BP medium containing streptomycin (A)                                                                   | Enriched in BP medium devoid of antibiotic and cultured under various conditions |                                         |                                                                                              |                                                                                                  |
|                       |                         |                                                                                      |                                                                       |                                                                                                                     | TTGA plates devoid of streptomycin (B)                                           | TTGA plates containing streptomycin (C) |                                                                                              |                                                                                                  |
| Jan. 2005             | 36                      | 2 (5.5)                                                                              | 11 (30.5)                                                             | $0.36 \times 10^1$                                                                                                  | $9.39 \times 10^2$                                                               | $3.48 \times 10^3$                      | 0.10                                                                                         | 26.98                                                                                            |
| Feb. 2005             | 55                      | 5 (9.0)                                                                              | 9 (16.3)                                                              | $1.28 \times 10^1$                                                                                                  | $1.78 \times 10^2$                                                               | $1.58 \times 10^3$                      | 0.81                                                                                         | 11.26                                                                                            |
| March 2005            | 42                      | 6 (14.2)                                                                             | 25 (59.5)                                                             | $0.24 \times 10^1$                                                                                                  | $0.83 \times 10^2$                                                               | $1.22 \times 10^3$                      | 0.19                                                                                         | 6.80                                                                                             |
| April 2005            | 41                      | 7 (17.0)                                                                             | 17 (41.4)                                                             | $2.17 \times 10^1$                                                                                                  | $2.17 \times 10^2$                                                               | $5.83 \times 10^3$                      | 0.37                                                                                         | 3.72                                                                                             |
| May 2005              | 44                      | 7 (15.9)                                                                             | 27 (61.3)                                                             | $0.11 \times 10^1$                                                                                                  | $0.66 \times 10^1$                                                               | $1.86 \times 10^3$                      | 0.05                                                                                         | 0.35                                                                                             |
| June 2005             | 36                      | 5 (13.8)                                                                             | 15 (41.6)                                                             | $0.60 \times 10^1$                                                                                                  | $5.3 \times 10^1$                                                                | $2.6 \times 10^3$                       | 0.23                                                                                         | 2.03                                                                                             |
| July 2005             | 40                      | 3 (7.5)                                                                              | 10 (25.0)                                                             | $0.20 \times 10^1$                                                                                                  | 0                                                                                | $6.3 \times 10^3$                       | 0.03                                                                                         | 0                                                                                                |
| Aug. 2005             | 50                      | 6 (12.0)                                                                             | 19 (38.0)                                                             | $4.84 \times 10^1$                                                                                                  | $5.5 \times 10^2$                                                                | $9.3 \times 10^4$                       | 0.05                                                                                         | 0.59                                                                                             |

TTGA, taurocholate–tellurite–gelatin agar.

\*Mean of *V. cholerae* O1 counts derived from the AST-positive water samples.

<sup>†</sup>Difference between the proportion of water samples found positive for *V. cholerae* O1 by conventional enrichment method vs. the AST method was statistically significant at  $P < 0.001$ .
