# Supplementary material
Source: PubMed Central journal article supplement (PMC1458881)
Supplement: pnas_0601277103_3.pdf [file pnas_0601277103_3.pdf]

**Table 4. Combination of fluctuation tests and growth kinetics assays for *V. cholerae* O1 CVEC in environmental water samples, compared with a laboratory-grown *V. cholerae* O1 strain of environmental origin**

| Date of collection and sample no. | Description of sample*                           |            | <i>V. cholerae</i> O1 counts (cfu/ml) <sup>†</sup> on TTGA plates containing streptomycin, after enrichment for 1–6 h in BP medium |                   |                   |                   |                   |                   |
|-----------------------------------|--------------------------------------------------|------------|------------------------------------------------------------------------------------------------------------------------------------|-------------------|-------------------|-------------------|-------------------|-------------------|
|                                   |                                                  |            | 1 h                                                                                                                                | 2 h               | 3 h               | 4 h               | 5 h               | 6 h               |
| Aug. 2, 2005<br>Sample 1664       | Undiluted sample (5 ml)                          |            | 0                                                                                                                                  | 0                 | $4.5 \times 10^1$ | $8.2 \times 10^2$ | $6.3 \times 10^3$ | $2.8 \times 10^4$ |
|                                   | Aliquots (500 $\mu$ l) of 10-fold diluted sample | Fraction 1 | 0                                                                                                                                  | 0                 | 0                 | 0                 | $5.1 \times 10^1$ | $2.7 \times 10^3$ |
|                                   |                                                  | Fraction 2 | 0                                                                                                                                  | 0                 | 0                 | 0                 | 0                 | 0                 |
|                                   |                                                  | Fraction 3 | 0                                                                                                                                  | 0                 | 0                 | 0                 | 0                 | 0                 |
|                                   |                                                  | Fraction 4 | 0                                                                                                                                  | 0                 | 0                 | 0                 | 0                 | 0                 |
|                                   |                                                  | Fraction 5 | 0                                                                                                                                  | 0                 | 0                 | 0                 | 0                 | 0                 |
|                                   |                                                  | Fraction 6 | 0                                                                                                                                  | 0                 | 0                 | 0                 | 0                 | 0                 |
|                                   |                                                  | Fraction 7 | 0                                                                                                                                  | 0                 | 0                 | 0                 | $4.2 \times 10^2$ | $2.7 \times 10^4$ |
|                                   |                                                  | Fraction 8 | 0                                                                                                                                  | 0                 | 0                 | 0                 | 0                 | 0                 |
|                                   |                                                  | Fraction 9 | 0                                                                                                                                  | 0                 | 0                 | 0                 | 0                 | 0                 |
| Fraction 10                       | 0                                                | 0          | 0                                                                                                                                  | $3.2 \times 10^1$ | $9.2 \times 10^2$ | $1.6 \times 10^4$ |                   |                   |
| Aug. 9, 2005<br>Sample 1674       | Undiluted sample 5 ml                            |            | 0                                                                                                                                  | 0                 | 0                 | $1.8 \times 10^2$ | $5.6 \times 10^3$ | $3.3 \times 10^4$ |
|                                   | Aliquots (500 $\mu$ l) of 10-fold diluted sample | Fraction 1 | 0                                                                                                                                  | 0                 | 0                 | 0                 | 0                 | 0                 |
|                                   |                                                  | Fraction 2 | 0                                                                                                                                  | 0                 | 0                 | 0                 | 0                 | 0                 |
|                                   |                                                  | Fraction 3 | 0                                                                                                                                  | 0                 | 0                 | $2.1 \times 10^2$ | $6.9 \times 10^3$ | $2.8 \times 10^4$ |
|                                   |                                                  | Fraction 4 | 0                                                                                                                                  | 0                 | 0                 | 0                 | 0                 | 0                 |
|                                   |                                                  | Fraction 5 | 0                                                                                                                                  | 0                 | 0                 | $2.4 \times 10^1$ | $1.2 \times 10^3$ | $5.6 \times 10^3$ |
|                                   |                                                  | Fraction 6 | 0                                                                                                                                  | 0                 | 0                 | 0                 | 0                 | 0                 |
|                                   |                                                  | Fraction 7 | 0                                                                                                                                  | 0                 | 0                 | $9.0 \times 10^1$ | $5.2 \times 10^2$ | $2.6 \times 10^3$ |
|                                   |                                                  | Fraction 8 | 0                                                                                                                                  | 0                 | 0                 | 0                 | 0                 | 0                 |
|                                   |                                                  | Fraction 9 | 0                                                                                                                                  | 0                 | 0                 | $5.0 \times 10^1$ | $6.9 \times 10^2$ | $3.7 \times 10^3$ |
| Fraction 10                       | 0                                                | 0          | 0                                                                                                                                  | 0                 | 0                 | 0                 |                   |                   |
| Aug. 14, 2005<br>Sample 1684      | Undiluted sample (5 ml)                          |            | 0                                                                                                                                  | 0                 | $5.0 \times 10^1$ | $8.2 \times 10^2$ | $1.2 \times 10^4$ | $4.8 \times 10^4$ |
|                                   | Aliquots (500 $\mu$ l) of 10-fold diluted sample | Fraction 1 | 0                                                                                                                                  | 0                 | 0                 | 0                 | 0                 | 0                 |
|                                   |                                                  | Fraction 2 | 0                                                                                                                                  | 0                 | 0                 | 0                 | 0                 | 0                 |

| Date of collection and sample no. | Description of sample*                      |             | <i>V. cholerae</i> O1 counts (cfu/ml) <sup>†</sup> on TTGA plates containing streptomycin, after enrichment for 1–6 h in BP medium |     |                   |                   |                   |                   |
|-----------------------------------|---------------------------------------------|-------------|------------------------------------------------------------------------------------------------------------------------------------|-----|-------------------|-------------------|-------------------|-------------------|
|                                   |                                             |             | 1 h                                                                                                                                | 2 h | 3 h               | 4 h               | 5 h               | 6 h               |
|                                   |                                             | Fraction 3  | 0                                                                                                                                  | 0   | 0                 | 0                 | 0                 | 0                 |
|                                   |                                             | Fraction 4  | 0                                                                                                                                  | 0   | $2.5 \times 10^1$ | $3.9 \times 10^2$ | $6.5 \times 10^3$ | $2.7 \times 10^4$ |
|                                   |                                             | Fraction 5  | 0                                                                                                                                  | 0   | 0                 | 0                 | 0                 | 0                 |
|                                   |                                             | Fraction 6  | 0                                                                                                                                  | 0   | 0                 | 0                 | 0                 | 0                 |
|                                   |                                             | Fraction 7  | 0                                                                                                                                  | 0   | 0                 | 0                 | 0                 | 0                 |
|                                   |                                             | Fraction 8  | 0                                                                                                                                  | 0   | 0                 | $8.2 \times 10^1$ | $7.8 \times 10^2$ | $7.8 \times 10^3$ |
|                                   |                                             | Fraction 9  | 0                                                                                                                                  | 0   | 0                 | 0                 | 0                 | 0                 |
|                                   |                                             | Fraction 10 | 0                                                                                                                                  | 0   | 0                 | 0                 | 0                 | 0                 |
|                                   |                                             |             |                                                                                                                                    |     |                   |                   |                   |                   |
| Oct. 16, 2005<br>Sample 1774      | Undiluted sample (5 ml)                     |             | 0                                                                                                                                  | 0   | 0                 | $4.6 \times 10^2$ | $9.2 \times 10^3$ | $3.5 \times 10^4$ |
|                                   | Aliquots (500 µl) of 10-fold diluted sample | Fraction 1  | 0                                                                                                                                  | 0   | 0                 | 0                 | 0                 | 0                 |
|                                   |                                             | Fraction 2  | 0                                                                                                                                  | 0   | 0                 | 0                 | 0                 | 0                 |
|                                   |                                             | Fraction 3  | 0                                                                                                                                  | 0   | 0                 | $3.2 \times 10^1$ | $2.9 \times 10^3$ | $1.5 \times 10^4$ |
|                                   |                                             | Fraction 4  | 0                                                                                                                                  | 0   | 0                 | $2.3 \times 10^1$ | $1.5 \times 10^3$ | $7.2 \times 10^3$ |
|                                   |                                             | Fraction 5  | 0                                                                                                                                  | 0   | 0                 | 0                 | 0                 | 0                 |
|                                   |                                             | Fraction 6  | 0                                                                                                                                  | 0   | 0                 | 0                 | 0                 | 0                 |
|                                   |                                             | Fraction 7  | 0                                                                                                                                  | 0   | 0                 | 0                 | 0                 | 0                 |
|                                   |                                             | Fraction 8  | 0                                                                                                                                  | 0   | 0                 | 0                 | 0                 | 0                 |
|                                   |                                             | Fraction 9  | 0                                                                                                                                  | 0   | 0                 | 0                 | 0                 | 0                 |
| Fraction 10                       |                                             | 0           | 0                                                                                                                                  | 0   | 0                 | 0                 | 0                 |                   |
| Nov. 28, 2005<br>Sample 1825      | Undiluted sample (5 ml)                     |             | 0                                                                                                                                  | 0   | $7.0 \times 10^1$ | $9.1 \times 10^2$ | $2.3 \times 10^4$ | $9.0 \times 10^4$ |
|                                   | Aliquots (500 µl) of 10-fold diluted sample | Fraction 1  | 0                                                                                                                                  | 0   | 0                 | 0                 | 0                 | 0                 |
|                                   |                                             | Fraction 2  | 0                                                                                                                                  | 0   | 0                 | 0                 | 0                 | 0                 |
|                                   |                                             | Fraction 3  | 0                                                                                                                                  | 0   | 0                 | 0                 | 0                 | 0                 |
|                                   |                                             | Fraction 4  | 0                                                                                                                                  | 0   | 0                 | 0                 | 0                 | 0                 |
|                                   |                                             | Fraction 5  | 0                                                                                                                                  | 0   | 0                 | 0                 | 0                 | 0                 |
|                                   |                                             | Fraction 6  | 0                                                                                                                                  | 0   | 0                 | 0                 | 0                 | 0                 |

| Date of collection and sample no.                                                                | Description of sample*                      |                   | <i>V. cholerae</i> O1 counts (cfu/ml) <sup>†</sup> on TTGA plates containing streptomycin, after enrichment for 1–6 h in BP medium |                   |                   |                   |                   |                   |
|--------------------------------------------------------------------------------------------------|---------------------------------------------|-------------------|------------------------------------------------------------------------------------------------------------------------------------|-------------------|-------------------|-------------------|-------------------|-------------------|
|                                                                                                  |                                             |                   | 1 h                                                                                                                                | 2 h               | 3 h               | 4 h               | 5 h               | 6 h               |
|                                                                                                  | Fraction 7                                  |                   | 0                                                                                                                                  | 0                 | $7.2 \times 10^1$ | $9.8 \times 10^2$ | $1.2 \times 10^4$ | $5.0 \times 10^4$ |
|                                                                                                  | Fraction 8                                  |                   | 0                                                                                                                                  | 0                 | 0                 | 0                 | 0                 | 0                 |
|                                                                                                  | Fraction 9                                  |                   | 0                                                                                                                                  | 0                 | 0                 | 0                 | 0                 | 0                 |
|                                                                                                  | Fraction 10                                 |                   | 0                                                                                                                                  | 0                 | 0                 | 0                 | 0                 | 0                 |
| Dec. 6, 2005<br>Sample 1844                                                                      | Undiluted sample (5 ml)                     |                   | 0                                                                                                                                  | 0                 | $5.5 \times 10^1$ | $5.6 \times 10^2$ | $2.9 \times 10^4$ | $1.5 \times 10^5$ |
|                                                                                                  | Aliquots (500 µl) of 10-fold diluted sample | Fraction 1        | 0                                                                                                                                  | 0                 | 0                 | 0                 | 0                 | 0                 |
|                                                                                                  |                                             | Fraction 2        | 0                                                                                                                                  | 0                 | 0                 | $7.2 \times 10^1$ | $2.5 \times 10^3$ | $1.9 \times 10^4$ |
|                                                                                                  |                                             | Fraction 3        | 0                                                                                                                                  | 0                 | 0                 | 0                 | 0                 | 0                 |
|                                                                                                  |                                             | Fraction 4        | 0                                                                                                                                  | 0                 | 0                 | $5.0 \times 10^2$ | $9.5 \times 10^4$ | $3.2 \times 10^5$ |
|                                                                                                  |                                             | Fraction 5        | 0                                                                                                                                  | 0                 | 0                 | 0                 | 0                 | 0                 |
|                                                                                                  |                                             | Fraction 6        | 0                                                                                                                                  | 0                 | 0                 | 0                 | 0                 | 0                 |
|                                                                                                  |                                             | Fraction 7        | 0                                                                                                                                  | 0                 | $2 \times 10^1$   | $3.2 \times 10^2$ | $7.5 \times 10^3$ | $2.3 \times 10^4$ |
|                                                                                                  |                                             | Fraction 8        | 0                                                                                                                                  | 0                 | 0                 | 0                 | 0                 | 0                 |
|                                                                                                  |                                             | Fraction 9        | 0                                                                                                                                  | 0                 | 0                 | 0                 | 0                 | 0                 |
| Fraction 10                                                                                      |                                             | 0                 | 0                                                                                                                                  | 0                 | 0                 | 0                 | 0                 |                   |
| Dec. 13, 2005<br>Sample 1847                                                                     | Undiluted sample (5 ml)                     |                   | 0                                                                                                                                  | 0                 | $5.2 \times 10^1$ | $7.3 \times 10^2$ | $2.1 \times 10^4$ | $8.2 \times 10^4$ |
|                                                                                                  | Aliquots (500 µl) of 10-fold diluted sample | Fraction 1        | 0                                                                                                                                  | 0                 | 0                 | 0                 | 0                 | 0                 |
|                                                                                                  |                                             | Fraction 2        | 0                                                                                                                                  | 0                 | 0                 | 0                 | 0                 | 0                 |
|                                                                                                  |                                             | Fraction 3        | 0                                                                                                                                  | 0                 | 0                 | 0                 | 0                 | 0                 |
|                                                                                                  |                                             | Fraction 4        | 0                                                                                                                                  | 0                 | 0                 | 0                 | 0                 | 0                 |
|                                                                                                  |                                             | Fraction 5        | 0                                                                                                                                  | 0                 | 0                 | 0                 | 0                 | 0                 |
|                                                                                                  |                                             | Fraction 6        | 0                                                                                                                                  | 0                 | $6.0 \times 10^1$ | $7.5 \times 10^2$ | $7.5 \times 10^3$ | $2.7 \times 10^4$ |
|                                                                                                  |                                             | Fraction 7        | 0                                                                                                                                  | 0                 | 0                 | 0                 | 0                 | 0                 |
|                                                                                                  |                                             | Fraction 8        | 0                                                                                                                                  | 0                 | 0                 | 0                 | 0                 | 0                 |
|                                                                                                  |                                             | Fraction 9        | 0                                                                                                                                  | 0                 | $2.0 \times 10^1$ | $8.4 \times 10^2$ | $1.6 \times 10^4$ | $7.8 \times 10^4$ |
| Fraction 10                                                                                      |                                             | 0                 | 0                                                                                                                                  | 0                 | 0                 | 0                 | 0                 |                   |
| Laboratory-grown strain 1734 diluted $10^6$ -fold in PBS and 500-µl aliquots used for each assay | Fraction 1                                  | $2.9 \times 10^2$ | $5.3 \times 10^2$                                                                                                                  | $2.3 \times 10^3$ | $8.9 \times 10^3$ | $3.2 \times 10^4$ | $9.8 \times 10^4$ |                   |

| Date of collection and sample no. | Description of sample* | <i>V. cholerae</i> O1 counts (cfu/ml) <sup>†</sup> on TTGA plates containing streptomycin, after enrichment for 1–6 h in BP medium |                   |                   |                   |                   |                   |
|-----------------------------------|------------------------|------------------------------------------------------------------------------------------------------------------------------------|-------------------|-------------------|-------------------|-------------------|-------------------|
|                                   |                        | 1 h                                                                                                                                | 2 h               | 3 h               | 4 h               | 5 h               | 6 h               |
|                                   | Fraction 2             | $2.5 \times 10^2$                                                                                                                  | $4.2 \times 10^2$ | $1.3 \times 10^3$ | $6.1 \times 10^3$ | $2.1 \times 10^4$ | $1.1 \times 10^5$ |
|                                   | Fraction 3             | $1.7 \times 10^2$                                                                                                                  | $3.2 \times 10^2$ | $1.1 \times 10^3$ | $5.0 \times 10^3$ | $1.9 \times 10^4$ | $7.7 \times 10^4$ |
|                                   | Fraction 4             | $2.1 \times 10^2$                                                                                                                  | $2.9 \times 10^2$ | $1.4 \times 10^3$ | $5.2 \times 10^3$ | $2.0 \times 10^4$ | $7.5 \times 10^4$ |
|                                   | Fraction 5             | $2.3 \times 10^2$                                                                                                                  | $4.8 \times 10^2$ | $1.7 \times 10^3$ | $5.3 \times 10^3$ | $2.2 \times 10^4$ | $9.1 \times 10^4$ |
|                                   | Fraction 6             | $1.9 \times 10^2$                                                                                                                  | $3.7 \times 10^2$ | $1.4 \times 10^3$ | $4.7 \times 10^3$ | $2.1 \times 10^4$ | $1.2 \times 10^5$ |
|                                   | Fraction 7             | $2.1 \times 10^2$                                                                                                                  | $3.8 \times 10^2$ | $1.8 \times 10^3$ | $5.0 \times 10^3$ | $1.7 \times 10^4$ | $7.2 \times 10^4$ |
|                                   | Fraction 8             | $1.8 \times 10^2$                                                                                                                  | $4.1 \times 10^2$ | $1.2 \times 10^3$ | $3.7 \times 10^3$ | $1.5 \times 10^4$ | $6.3 \times 10^4$ |
|                                   | Fraction 9             | $2.0 \times 10^2$                                                                                                                  | $3.2 \times 10^2$ | $9.5 \times 10^2$ | $4.2 \times 10^3$ | $1.0 \times 10^4$ | $5.1 \times 10^4$ |
|                                   | Fraction 10            | $2.4 \times 10^2$                                                                                                                  | $3.6 \times 10^2$ | $1.2 \times 10^3$ | $5.0 \times 10^3$ | $1.8 \times 10^4$ | $8.2 \times 10^4$ |

TTGA, taurocholate–tellurite–gelatin agar.

\*For the fluctuation test, the water sample was diluted 10 times in BP medium, and 500  $\mu$ l of the diluted sample was used in each fraction (effective volume of water used was equivalent to 50  $\mu$ l of undiluted sample).

<sup>†</sup>A colony count of zero means that no colonies were detected on plating of 100- $\mu$ l aliquots of enriched culture. In theory, the concentration should be <10 colonies per ml.
