# Supplementary material
Source: PubMed Central journal article supplement (PMC1458881)
Supplement: pnas_0601277103_4.pdf [file pnas_0601277103_4.pdf]

**Table 5. Resuscitation of CVEC of toxigenic *V. cholerae* O1 in the ileal loops of adult rabbits, as determined by fluctuation test**

| Date of collection and sample no. | No. of aliquots tested* | No. of aliquots positive for <i>V. cholerae</i> O1 in the ileal loop | No. of loops showing fluid accumulation | <i>V. cholerae</i> O1 counts (cfu/ml) in rabbit ileal loops, on TTGA plates containing streptomycin |                   |
|-----------------------------------|-------------------------|----------------------------------------------------------------------|-----------------------------------------|-----------------------------------------------------------------------------------------------------|-------------------|
|                                   |                         |                                                                      |                                         | Range                                                                                               | Median            |
| Oct. 30, 2005<br>Sample 1794      | 10                      | 5                                                                    | 0                                       | $2.3 \times 10^3$ to $1.1 \times 10^4$                                                              | $4.2 \times 10^3$ |
| Nov. 11, 2005<br>Sample 1804      | 11                      | 4                                                                    | 3                                       | $1.4 \times 10^4$ to $6.3 \times 10^5$                                                              | $4.3 \times 10^5$ |
| Nov. 15, 2005<br>Sample 1807      | 5                       | 3                                                                    | 0                                       | $1.2 \times 10^2$ to $4.8 \times 10^2$                                                              | $3.5 \times 10^2$ |
| Nov. 21, 2005<br>Sample 1814      | 12                      | 5                                                                    | 2                                       | $2.1 \times 10^2$ to $3.0 \times 10^6$                                                              | $3.2 \times 10^5$ |
| Nov. 28, 2005<br>Sample 1824      | 8                       | 5                                                                    | 4                                       | $2.1 \times 10^5$ to $5.7 \times 10^6$                                                              | $1.4 \times 10^6$ |
| Nov. 28, 2005<br>Sample 1825      | 8                       | 3                                                                    | 2                                       | $2.4 \times 10^4$ to $1.2 \times 10^5$                                                              | $5.1 \times 10^5$ |
| Dec. 6, 2005<br>Sample 1834       | 7                       | 4                                                                    | 1                                       | $1.1 \times 10^3$ to $2.0 \times 10^6$                                                              | $1.8 \times 10^4$ |
| Dec. 6, 2005<br>Sample 1844       | 6                       | 3                                                                    | 1                                       | $6.0 \times 10^4$ to $9.2 \times 10^5$                                                              | $4.1 \times 10^5$ |
| Dec. 13, 2005<br>Sample 1845      | 5                       | 1                                                                    | 1                                       | $5.1 \times 10^5$                                                                                   | $5.1 \times 10^5$ |
| Dec. 13, 2005<br>Sample 1847      | 5                       | 3                                                                    | 0                                       | $4.1 \times 10^5$ to $9.2 \times 10^5$                                                              | $5.2 \times 10^5$ |
| Total                             | 77                      | 36                                                                   | 14                                      | $1.2 \times 10^2$ to $5.7 \times 10^6$                                                              | $4.2 \times 10^5$ |

\*Several aliquots (1 ml) of each water sample were inoculated into different ileal loops. The water samples were negative for *V. cholerae* O1 in conventional enrichment culture, but were positive for CVEC by the AST assay.
