# Supplementary material
Source: PubMed Central journal article supplement (PMC1458881)
Supplement: pnas_0601277103_5.pdf [file pnas_0601277103_5.pdf]

**Table 6. Analysis of environmental water samples spiked with diluted cholera stools for the presence of CVEC-like *V. cholerae* O1 cells**

| Stool sample ID | <i>V. cholerae</i> O1 counts (cfu/ml) on TTGA plates containing streptomycin, after enrichment for 6 h under various conditions |                                            |                                              |
|-----------------|---------------------------------------------------------------------------------------------------------------------------------|--------------------------------------------|----------------------------------------------|
|                 | BP medium without antibiotic                                                                                                    | BP medium containing streptomycin (BP+Sm)* | BP medium containing nalidixic acid (BP+Nal) |
| 2575647         | $6.4 \times 10^5$                                                                                                               | 0                                          | $3.8 \times 10^5$                            |
| 2579288         | $8.0 \times 10^3$                                                                                                               | 0                                          | $7.6 \times 10^2$                            |
| 2580779         | $2.7 \times 10^6$                                                                                                               | 0                                          | $1.4 \times 10^6$                            |
| 2581251         | $6.3 \times 10^5$                                                                                                               | $2.0 \times 10^1$                          | $5.5 \times 10^5$                            |
| 2581266         | $3.9 \times 10^4$                                                                                                               | $3.1 \times 10^1$                          | $8.1 \times 10^3$                            |
| 2591469         | $6.9 \times 10^4$                                                                                                               | 0                                          | $5.4 \times 10^4$                            |
| 2597952         | $2.8 \times 10^5$                                                                                                               | $2.1 \times 10^1$                          | $3.9 \times 10^5$                            |

*V. cholerae*-negative environmental water samples were spiked with diluted cholera stools and analyzed after holding for 6 h at room temperature.

\*A colony count of zero means that no colonies were detected on plating of 100- $\mu$ l aliquots of enriched culture. In theory, the concentration should be <10 colonies per ml.
