# Supplementary material
Source: PubMed Central journal article supplement (PMC1458881)
Supplement: pnas_0601277103_6.pdf [file pnas_0601277103_6.pdf]

**Table 7. Growth kinetics analysis of cholera stool vibrios for the presence of CVEC-like *V. cholerae* O1 cells, after dilution and incubation in environmental water samples**

| Stool sample ID | Description of sample                                                                                 | <i>V. cholerae</i> O1 counts (cfu/ml)* on TTGA plates containing streptomycin, after enrichment for 1–6 h in BP medium |                   |                   |                   |                   |                   |                   |
|-----------------|-------------------------------------------------------------------------------------------------------|------------------------------------------------------------------------------------------------------------------------|-------------------|-------------------|-------------------|-------------------|-------------------|-------------------|
|                 |                                                                                                       | 0 h                                                                                                                    | 1 h               | 2 h               | 3 h               | 4 h               | 5 h               | 6 h               |
| 2575316         | Stool sample diluted in environmental water and assayed after incubation for 6 h at room temperature  | 0                                                                                                                      | $2.3 \times 10^1$ | $1.1 \times 10^2$ | $2.3 \times 10^3$ | $3.6 \times 10^4$ | $9.5 \times 10^4$ | $4.0 \times 10^5$ |
| 2575647         |                                                                                                       | 0                                                                                                                      | 0                 | $1.6 \times 10^2$ | $6.1 \times 10^3$ | $3.9 \times 10^4$ | $8.7 \times 10^4$ | $6.4 \times 10^5$ |
| 2591469         |                                                                                                       | $2.0 \times 10^1$                                                                                                      | $7.0 \times 10^1$ | $8.7 \times 10^2$ | $1.3 \times 10^3$ | $2.6 \times 10^4$ | $1.1 \times 10^5$ | $5.6 \times 10^5$ |
| 2597952         |                                                                                                       | 0                                                                                                                      | $7.0 \times 10^1$ | $1.5 \times 10^2$ | $8.2 \times 10^3$ | $2.9 \times 10^4$ | $2.7 \times 10^5$ | $6.0 \times 10^5$ |
| 2575316         | Stool sample diluted in environmental water and assayed after incubation for 72 h at room temperature | 0                                                                                                                      | 0                 | $4.8 \times 10^2$ | $5.5 \times 10^3$ | $2.8 \times 10^4$ | $4.7 \times 10^4$ | $1.8 \times 10^5$ |
| 2575647         |                                                                                                       | 0                                                                                                                      | 0                 | 0                 | 0                 | $2.3 \times 10^2$ | $5.0 \times 10^3$ | $3.2 \times 10^4$ |
| 2591469         |                                                                                                       | 0                                                                                                                      | 0                 | 0                 | $6.0 \times 10^1$ | $1.2 \times 10^3$ | $8.4 \times 10^3$ | $2.5 \times 10^4$ |
| 2597952         |                                                                                                       | 0                                                                                                                      | 0                 | 0                 | $3.2 \times 10^2$ | $9.1 \times 10^3$ | $4.7 \times 10^4$ | $1.2 \times 10^5$ |
| 2575316         | Stool sample diluted in PBS (pH 7.2) and assayed after incubation for 6 h at room temperature         | $5.2 \times 10^3$                                                                                                      | $1.6 \times 10^4$ | $2.1 \times 10^4$ | $6.3 \times 10^4$ | $1.2 \times 10^5$ | $9.1 \times 10^5$ | $2.0 \times 10^6$ |
| 2575647         |                                                                                                       | $4.5 \times 10^2$                                                                                                      | $6.4 \times 10^2$ | $1.5 \times 10^3$ | $1.1 \times 10^4$ | $9.5 \times 10^4$ | $7.2 \times 10^5$ | $1.1 \times 10^6$ |
| 2597952         |                                                                                                       | $3.6 \times 10^2$                                                                                                      | $1.5 \times 10^3$ | $8.1 \times 10^3$ | $3.5 \times 10^4$ | $1.5 \times 10^5$ | $8.1 \times 10^5$ | $3.2 \times 10^6$ |

\*A colony count of zero means no colonies were detected on plating of 100- $\mu$ l aliquots of enriched culture. In theory, the concentration should be <10 colonies per ml.
