# Supplementary material
Source: PubMed Central journal article supplement (PMC1458881)
Supplement: pnas_0601277103_7.pdf [file pnas_0601277103_7.pdf]

**Table 8. Competitive index (infectivity) of *V. cholerae* in different fractions of cholera stools, in competition with a reference strain grown to stationary phase and logarithmic phase**

| Stool sample ID | Growth phase of reference strain | Mean competitive index of stool vibrios with reference strain<br>( <i>n</i> = number of mice inoculated) |                       |                       |
|-----------------|----------------------------------|----------------------------------------------------------------------------------------------------------|-----------------------|-----------------------|
|                 |                                  | Whole unfractionated stools                                                                              | Planktonic cells      | Clumped cells         |
| 2395693         | Logarithmic                      | 4.2 ( <i>n</i> = 5)                                                                                      | 2.1 ( <i>n</i> = 5)   | 38.6 ( <i>n</i> = 5)  |
|                 | Stationary                       | 45.6 ( <i>n</i> = 5)                                                                                     | 11.6 ( <i>n</i> = 5)  | 195.4 ( <i>n</i> = 6) |
| 2395711         | Logarithmic                      | 4.5 ( <i>n</i> = 5)                                                                                      | 2.7 ( <i>n</i> = 5)   | 32.5 ( <i>n</i> = 5)  |
|                 | Stationary                       | 50.4 ( <i>n</i> = 5)                                                                                     | 30.5 ( <i>n</i> = 5)  | 182 ( <i>n</i> = 5)   |
| 2396551         | Logarithmic                      | 7.7 ( <i>n</i> = 7)                                                                                      | 3.2 ( <i>n</i> = 5)   | 202.1 ( <i>n</i> = 5) |
|                 | Stationary                       | 63.2 ( <i>n</i> = 5)                                                                                     | 16.3 ( <i>n</i> = 5)  | 492.4 ( <i>n</i> = 6) |
| 2401437         | Logarithmic                      | 6.1 ( <i>n</i> = 7)                                                                                      | 2.3 ( <i>n</i> = 5)   | 112.4 ( <i>n</i> = 5) |
|                 | Stationary                       | 36.5 ( <i>n</i> = 5)                                                                                     | 12.4 ( <i>n</i> = 5)  | 543.7 ( <i>n</i> = 6) |
| 2597952         | Logarithmic                      | 62.2 ( <i>n</i> = 10)                                                                                    | 4.8 ( <i>n</i> = 10)  | 695.5 ( <i>n</i> = 8) |
|                 | Stationary                       | 325.4 ( <i>n</i> = 10)                                                                                   | 25.5 ( <i>n</i> = 10) | ND                    |
| 2599225         | Logarithmic                      | 29.6 ( <i>n</i> = 5)                                                                                     | 12.1 ( <i>n</i> = 5)  | 324.7 ( <i>n</i> = 4) |
|                 | Stationary                       | 148 ( <i>n</i> = 5)                                                                                      | 75 ( <i>n</i> = 5)    | ND                    |
| 2587262         | Logarithmic                      | 24.0 ( <i>n</i> = 7)                                                                                     | 8.7 ( <i>n</i> = 7)   | 470.1 ( <i>n</i> = 9) |
|                 | Stationary                       | ND                                                                                                       | ND                    | ND                    |
| 2590265         | Logarithmic                      | 9.1 ( <i>n</i> = 5)                                                                                      | 4.2 ( <i>n</i> = 5)   | 126.7 ( <i>n</i> = 5) |
|                 | Stationary                       | 72.1 ( <i>n</i> = 5)                                                                                     | 28.2 ( <i>n</i> = 5)  | 623.3 ( <i>n</i> = 5) |
| 2590268         | Logarithmic                      | 6.8 ( <i>n</i> = 5)                                                                                      | 3.2 ( <i>n</i> = 5)   | 42.9 ( <i>n</i> = 5)  |
|                 | Stationary                       | 36.0 ( <i>n</i> = 5)                                                                                     | 27.1 ( <i>n</i> = 5)  | 257.5 ( <i>n</i> = 5) |
| 2591469         | Logarithmic                      | 4.5 ( <i>n</i> = 8)                                                                                      | 2.0 ( <i>n</i> = 6)   | 90.3 ( <i>n</i> = 8)  |
|                 | Stationary                       | ND                                                                                                       | ND                    | ND                    |

ND, not done.
